# Supplementary material for: Simple tools for assembling and searching high-density picolitre pyrophosphate sequence data
Source: PubMed Central journal article supplement (PMC2374781; doi:10.1186/1751-0473-3-5), 2008-04-18
Supplement: 1751-0473-3-5-S3.pdf [file 1751-0473-3-5-S3.pdf]

## Supplementary Table 1. Section of the output from `re`

Section of output showing the matches falling to zero where a single erroneous base has been inserted by the assembler, marked in red. For column descriptions see the section on `re` in main paper.

|      |   |                                     |          |    |      |    |      |
|------|---|-------------------------------------|----------|----|------|----|------|
| 2761 | T | GTTGTGGGTTAAAAAATACTTCCTCACCTTCATAA | C        | 43 | 100% | 43 | 100% |
| 2762 | G | TTGTGGGTTAAAAAATACTTCCTCACCTTCATAAC | T        | 43 | 97%  | 44 | 100% |
| 2763 | T | TGTGGGTTAAAAAATACTTCCTCACCTTCATAACT | G        | 44 | 100% | 44 | 100% |
| 2764 | T | GTGGGTTAAAAAATACTTCCTCACCTTCATAACTG | T        | 44 | 100% | 45 | 100% |
| 2765 | G | TGGGTTAAAAAATACTTCCTCACCTTCATAACTGT | T        | 45 | 100% | 45 | 97%  |
| 2766 | T | GGGTTAAAAAATACTTCCTCACCTTCATAACTGTT | G        | 45 | 97%  | 44 | 95%  |
| 2767 | G | GGTAAAAAATACTTCCTCACCTTCATAACTGTTG  | C        | 44 | 100% | 45 | 100% |
| 2768 | G | GTTAAAAAATACTTCCTCACCTTCATAACTGTTGC | <b>C</b> | 45 | 100% | 0  | 0%   |
| 2769 | G | TTAAAAAATACTTCCTCACCTTCATAACTGTTGCC | T        | 0  | 0%   | 0  | 0%   |
| 2770 | T | TAAAAAATACTTCCTCACCTTCATAACTGTTGCCT | T        | 0  | 0%   | 0  | 0%   |
| 2771 | T | AAAAAATACTTCCTCACCTTCATAACTGTTGCCTT | T        | 0  | 0%   | 0  | 0%   |
| 2772 | A | AAAAATACTTCCTCACCTTCATAACTGTTGCCTTT | C        | 0  | 0%   | 0  | 0%   |
| 2773 | A | AAAATACTTCCTCACCTTCATAACTGTTGCCTTTC | C        | 0  | 0%   | 0  | 0%   |
| 2774 | A | AAATACTTCCTCACCTTCATAACTGTTGCCTTTCC | C        | 0  | 0%   | 0  | 0%   |



### Supplementary Table 3. Output from `fr2`

Output from `fr2` showing the presence of a putative polymorphism in the SGHV. `fr2` left truncates the reads to the beginning of `search_string` before displaying them to allow the sequences to be compared. The forward and complemented reads are shown separately, each sorted into alphabetical order. The last four entries in the reverse reads have an alternative sequence

```
GGTATTTTAGGTGTGTTGTGAACAGGATTGTTAACAAAATTAACACTCCCAT
```

```
GGTAT.TTAGGTGTG.TGTGAACAGGATTG.TAACAAAA.TAACAC.CCCAT
```

>

```
GGTATATTAGGTGTGCTGTGAACAGGATTGCTAACAAAAGTAACACCCCCATTGTTAATTTGAAA  
GGTATATTAGGTGTGCTGTGAACAGGATTGCTAACAAAAGTAACACCCCCATTGTTAATTTGAAAA  
GGTATATTAGGTGTGCTGTGAACAGGATTGCTAACAAAAGTAACACCCCCATTGTTAATTTGAAAATCTC  
GGTATATTAGGTGTGCTGTGAACAGGATTGCTAACAAAAGTAACACCCCCATTGTTAATTTGAAAATCTCTATTA  
GGTATATTAGGTGTGCTGTGAACAGGATTGCTAACAAAAGTAACACCCCCATTGTTAATTTGAAAATCTCTATTATTA  
GGTATATTAGGTGTGCTGTGAACAGGATTGCTAACAAAAGTAACACCCCCATTGTTAATTTGAAAATCTCTATTATTATC  
GGTATATTAGGTGTGCTGTGAACAGGATTGCTAACAAAAGTAACACCCCCATTGTTAATTTGAAAATCTCTATTATTATC  
GGTATATTAGGTGTGCTGTGAACAGGATTGCTAACAAAAGTAACACCCCCATTGTTAATTTGAAAATCTCTATTATTATCTGTTAATAC  
GGTATATTAGGTGTGCTGTGAACAGGATTGCTAACAAAAGTAACACCCCCATTGTTAATTTGAAAATCTCTATTATTATCTGTTAATAC  
GGTATATTAGGTGTGCTGTGAACAGGATTGCTAACAAAAGTAACACCCCCATTGTTAATTTGAAAATCTCTATTATTATCTGTTAATACTGTATATTCAAATTCGAACG  
GGTATATTAGGTGTGCTGTGAACAGGATTGCTAACAAAAGTAACACCCCCATTGTTAATTTGAAAATCTCTATTATTATCTGTTAATACTGTATATTCAAATTCGAACG  
GGTATATTAGGTGTGCTGTGAACAGGATTGCTAACAAAAGTAACACCCCCATTGTTAATTTGAAAATCTCTATTATTATCTGTTAATACTGTG
```

<

```
GGTATATTAGGTGTGCTGTGAACAGGATTGCTAACAAAAGTAACACCCCCATTG  
GGTATATTAGGTGTGCTGTGAACAGGATTGCTAACAAAAGTAACACCCCCATTG  
GGTATATTAGGTGTGCTGTGAACAGGATTGCTAACAAAAGTAACACCCCCATTG  
GGTATATTAGGTGTGCTGTGAACAGGATTGCTAACAAAAGTAACACCCCCATTGTTA  
GGTATATTAGGTGTGCTGTGAACAGGATTGCTAACAAAAGTAACACCCCCATTGTTAA  
GGTATATTAGGTGTGCTGTGAACAGGATTGCTAACAAAAGTAACACCCCCATTGTTAAT  
GGTATATTAGGTGTGCTGTGAACAGGATTGCTAACAAAAGTAACACCCCCATTGTTAATTTG  
GGTATATTAGGTGTGCTGTGAACAGGATTGCTAACAAAAGTAACACCCCCATTGTTAATTTGAAAATCTC  
GGTATATTAGGTGTGCTGTGAACAGGATTGCTAACAAAAGTAACACCCCCATTGTTAATTTGAAAATCTCT  
GGTATATTAGGTGTGCTGTGAACAGGATTGCTAACAAAAGTAACACCCCCATTGTTAATTTGAAAATCTCTATT  
GGTATATTAGGTGTGCTGTGAACAGGATTGCTAACAAAAGTAACACCCCCATTGTTAATTTGAAAATCTCTATTATTATCTGTTAATACTGTATATTCAA  
GGTATATTAGGTGTGCTGTGAACAGGATTGCTAACAAAAGTAACACCCCCATTGTTAATTTGAAAATCTCTATTATTATCTGTTAATACTGTATATTCAAAT
```



**Supplementary Table 4. Frequency of some repeat sequences from the SGHV**

Including some false sequences created by changing a single base in an existing repeat

| Repeat | Copies in Sequence           | Copies in 454 reads |     |
|--------|------------------------------|---------------------|-----|
| <p1>   | GAATGATTCTGGTATATCAATTGTCCC  | 1                   | 85  |
| <p2>   | GAATAGTTTCAGTACAACAAATCACCC  | 2                   | 176 |
| <p3>   | GAATCGTTTCAGTACAACAAAACACCC  | 0                   | 6   |
| <p4>   | GAATCGTTTCAGTACATCAATTGTCCC  | 0                   | 2   |
| <p5>   | GAATGGTTTCAGTATAACAAATTACCC  | 2                   | 151 |
| <p6>   | GAATGGTTTCAGTACTACAATTGGCCC  | 1                   | 87  |
| <p7>   | GAATGATTCTAGTACTACAATTGACGC  | 1                   | 95  |
| <p8>   | GAATGATTCTAGTACTACAATTGGCCC  | 1                   | 106 |
| <p9>   | AGATCATTTTAATACAATAACTGACCC  | 1                   | 81  |
| <p10>  | AAATGATTCTGGTATATCAATTGTCCC  | 0                   | 1   |
| <p11>  | TAATGATTCTGGTATATCAATTGTCCC  | 0                   | 2   |
| <p12>  | GAATGATTCTAGTATATCAATTGTCCC  | 3                   | 224 |
| <p13>  | GAATGATTCTGGTATATCAATTGACCC  | 0                   | 5   |
| <p14>  | GAATGATTCTGGTATATCAATTGCCCC  | 0                   | 0   |
| <p15>  | GAATGATTCTGGTATATCAATTGGCCC  | 1                   | 72  |
| <p16>  | TAATAGTTTCAGTACAACAAATCACCC  | 0                   | 1   |
| <p17>  | GAATGGTTTCAGTACAACAAATCACCC  | 2                   | 166 |
| <p18>  | GAATAGTTTCAGTACAACAAATCCCCC  | 0                   | 0   |
| <p19>  | GAATAGTTTCAGTACAACAAATCGCCC  | 0                   | 0   |
| <p20>  | TAATGGTTTCAGTATAACAAATTACCC  | 0                   | 0   |
| <p21>  | GAATGGTTACAGTATAACAAATTACCC  | 0                   | 1   |
| <p22>  | AAATGGTTTCAGTACTACAATTGGCCC  | 0                   | 1   |
| <p23>  | GAATGGTTTCAGTACTACAATTAGCCC  | 0                   | 0   |
| <p24>  | GAATGGTTTCAGTACTACAATTTGCCC  | 0                   | 0   |
| <p25>  | TAATCGTTTCAGTACATCAATTGACCC  | 0                   | 0   |
| <p26>  | GAATGGTTTCAGTACATCAATTGACCC  | 0                   | 0   |
| <p27>  | GAATCTTTTCAGTACATCAATTGACCC  | 0                   | 0   |
| <p28>  | GAATCGGTTTCAGTACATCAATTGACCC | 0                   | 1   |
| <p29>  | GAATCGTTTCAGTATATCAATTGACCC  | 0                   | 0   |
| <p30>  | GAATGGTTTCAGTATATCAATTGACCC  | 1                   | 81  |
| <p31>  | GAATAGTTTCAGTATATCAATTGACCC  | 0                   | 0   |
| <p32>  | GAATCGTTTCAGTACATCAATTGTCCC  | 0                   | 0   |
| <p33>  | GAATGGTTTCAGTACATCAATTGTCCC  | 0                   | 0   |
| <p34>  | GGATGATTCTAGTATATCAATTGTCCC  | 0                   | 0   |
| <p35>  | GAATTATTCTAGTATATCAATTGTCCC  | 0                   | 0   |
| <p36>  | GAATGATTCTATTATATCAATTGTCCC  | 0                   | 0   |
| <p37>  | GAATGATTCTAGTATATCAATCGTCCC  | 0                   | 0   |
| <p38>  | GAATGATTCTAGTATATCAATTGACCC  | 0                   | 0   |
| <p49>  | GAATAGTTTCAGTATATTAATTGACCC  | 1                   | 76  |
| <p50>  | GAATAGTTTCAGTATATCAACTGACCC  | 0                   | 0   |
| <p56>  | GAATAGTTTCAGTATATCAATTGGCCC  | 1                   | 77  |
| <p57>  | GAATCGTTTCAGTATATCAATTGGCCC  | 0                   | 0   |
| <p58>  | GAATGGTTTCAGTATATCAATTGGCCC  | 1                   | 95  |
| <p65>  | GAATGATTCTGGTATAACAAATTACCC  | 2                   | 169 |
| <p66>  | GAATGATTCTGGTATATCAATTGTCTT  | 1                   | 76  |
| <p67>  | GAATCGTTTCAGTACATCAATTGACGC  | 1                   | 75  |
| <p68>  | GAATGGTTTCAGTACATCAATTGTACG  | 0                   | 2   |

Parker N.J. and A.G. Parker (2008) **Simple tools for assembling and searching high-density picolitre pyrophosphate sequence data.** *Source Code for Biology and Medicine.*

|       |                               |       |    |
|-------|-------------------------------|-------|----|
| <p76> | GAATGGTTTCAGTACATCAATTGACGC   | 1     | 71 |
| <p77> | GAATCTTTTCAGTACATCAATTGACGC   | 0     | 1  |
| <p78> | GAATCGTTTCAGTATATCAATTGACGC   | 1     | 89 |
| <p79> | GAATGGTTTCAGTATATCAATTGACGC   | 1     | 70 |
| <p80> | GAATAGTTTCAGTATATCAATTGACGC   | 0     | 11 |
| <p81> | GAATGGTTTCAGTACATCAATTGTACG   | 0     | 2  |
| <p82> | GAATGATTCTAGTATATCAATTGACGC   | 1     | 79 |
| <p83> | GAATAGTTTCAATATATCAATTGATGC   | 0     | 3  |
| <p84> | GAATAGTTTCAGTATATCAACTGACTC   | 1     | 90 |
| <p85> | GAATCGTTTCAGTATATCAACTGACTC   | 1     | 88 |
| <p86> | GAATGGTTTCAGTATATCAACTGACGC   | 1     | 76 |
| <p87> | GAATCGTTTCAGTATATCAATTGGCGC   | 0     | 5  |
| <p88> | GAATGGTTTCAGTATATCAATTGGCTC   | 1     | 84 |
| <p89> | GAATGGTTTCAGTATATCAATTAGACC   | 0     | 3  |
| <p90> | GAATGATTCTAGTACTACAATTGTCCC   | 1     | 71 |
| <p91> | GAATGATTTTAATACAATAACTGACCC   | 1     | 72 |
| <p92> | GAATATTCTATGTACTAGTACTGTTTT   | 1     | 65 |
| <p93> | AGATCATTTTAAATATAATAACTGACCC  | 1     | 79 |
| <p94> | GAATGATTTTAGTACTACAATTGACCC   | 1     | 87 |
| <p95> | GAATAGTTTCAGTATATCAGGTAAGTGA  | 1     | 79 |
| <p96> | AGATCATTTTCAGTACAACAAGTTACCC  | 1     | 90 |
| <p97> | AAATGATTTTAAATATAACCAAATGACCC | 1     | 69 |
| <p98> | GAATGATTCTTGTACCTCATATAATAA   | 1     | 56 |
| <p99> | GAATAGTTTTAGTACAACAATCACCC    | 0     | 0  |
|       |                               | <hr/> |    |
|       |                               | 40    |    |
|       |                               | <hr/> |    |

|       |                               |       |     |
|-------|-------------------------------|-------|-----|
| <q1>  | GGGGCATCAGAGAAAAAGACAGAAATAT  | 3     | 221 |
| <q2>  | GGGGCATCAGAGAAAAAGACGTAAATAT  | 2     | 159 |
| <q3>  | GGGACATTATAGAAAAAGACAGAAATAT  | 3     | 217 |
| <q4>  | GGGACATTTTtagAAAAAGACAGAAATAT | 11    | 793 |
| <q5>  | GGGACATTTTtagAAAAAGACGTAAATAT | 1     | 93  |
| <q6>  | GGGACATTTTtagAAAAAGACGGAAATAT | 1     | 70  |
| <q7>  | GGGACATTATAAAAAAAGACAGAAATAT  | 3     | 198 |
| <q8>  | GGGACATTATAAAAAAAGACATTATAAT  | 1     | 61  |
| <q9>  | GGGACATTATAAAAAAAGACGTAAATAT  | 2     | 125 |
| <q10> | GGGACATTATAAAAAAAGACAGAATTAT  | 1     | 63  |
| <q11> | GGGACATTATATAAAAAAGACAGAAATAT | 2     | 144 |
| <q12> | AGATCATTAGAGAAAAAGACGTAAATAT  | 1     | 80  |
| <q13> | GGGACATTTTAAAAAAGACAGAAATAT   | 1     | 58  |
| <q14> | GGGCATTATAGAAAAAGACAAAAATAT   | 1     | 57  |
| <q15> | GAGTCATTATAAAAAAAGACAGAAATAT  | 1     | 63  |
| <q16> | GGGTCATCAGAGAAAAAGACAGAAATAT  | 3     | 268 |
| <q17> | GGGTCATTATAAAAAAAGACAGAAATAT  | 1     | 65  |
| <q18> | GGGACATTTTtagAAAAAGACAAAAATAT | 1     | 66  |
| <q19> | AGGACATTTTtagAAAAAGACAGAAATAT | 1     | 72  |
| <q20> | GGGTCATTATAAAAAAAGACAAAAATAT  | 1     | 50  |
|       |                               | <hr/> |     |
|       |                               | 41    |     |
|       |                               | <hr/> |     |
